# Supplementary material for: Incidence of childhood cancer in Canada during the COVID-19 pandemic
Source: PubMed Central journal article supplement — CMAJ. 2021 Nov 29;193(47):E1798–806. doi: 10.1503/cmaj.210659 (PMC8654886; doi:10.1503/cmaj.210659), 2021-11-29
Supplement: 210659-res-1-at.pdf [file 210659-res-1-at.pdf]

### Supplement 1. Lists of participating centers in Cancer in Young People - Canada

| Center                                            | Location                    | Local CYP-C Principal Investigator    |
|---------------------------------------------------|-----------------------------|---------------------------------------|
| Alberta Children's Hospital                       | Calgary, Alberta            | Dr. Tony Truong                       |
| Allan Blair Cancer Centre                         | Regina, Saskatchewan        | Dr. Saima Alvi/Dr. Riaz Alvi          |
| British Columbia Children's Hospital              | Vancouver, British Columbia | Dr. Caron Strahlendorf                |
| CancerCare Manitoba                               | Winnipeg, Manitoba          | Dr. Sara Israels                      |
| Children's Hospital of Eastern Ontario            | Ottawa, Ontario             | Dr. Donna Johnston                    |
| CHU de Québec – Université Laval                  | Quebec City, Quebec         | Dr. Valérie Larouche                  |
| CHU de Sherbrooke                                 | Sherbrooke, Quebec          | Dr. Josée Brossard                    |
| CHU Sainte-Justine                                | Montreal, Quebec            | Dr. Henrique Bittencourt              |
| Hospital for Sick Children                        | Toronto, Ontario            | Dr. Lillian Sung/<br>Dr. Jim Whitlock |
| IWK Health Centre                                 | Halifax, Nova Scotia        | Dr. Ketan Kulkarni                    |
| Janeway Children's Health & Rehabilitation Centre | St John's, Newfoundland     | Dr. Lynette Bowes                     |
| Kingston General Hospital                         | Kingston, Ontario           | Dr. Laura Wheaton                     |
| Children's Hospital, London Health                | London, Ontario             | Dr. Alexandra Zorzi                   |
| McMaster University                               | Hamilton, Ontario           | Dr. Carol Portwine                    |
| Montreal Children's Hospital                      | Montreal, Quebec            | Dr. David Mitchell                    |
| Saskatoon Cancer Centre                           | Saskatoon, Saskatchewan     | Dr. Saima Alva/Dr. Riaz Alvi          |
| Stollery Children's Hospital                      | Edmonton, Alberta           | Dr. Bev Wilson                        |

## Supplement 2. Methodological principles of the interventional autoregressive integrated moving average model

The autoregressive integrated moving average (ARIMA) method considers the link of the current value with the past values of the time series, and its stochastic components to forecast future values. The general multiplicative ARIMA model which is denoted as ARIMA  $(p, d, q)(P, D, Q)_s^{1-3}$  can be written as

$$\varphi_p(B)\Phi_P(B^s)(1-B)^d(1-B^s)^D y_t = C + \theta_q(B)\theta_Q(B^s)\varepsilon_t,$$

where,  $y_t$  is the observed value at time  $t$ .  $B$  is the backshift operator  $By_t = y_{t-1}$ .  $\varepsilon_t$  is the value of the random error at time  $t$  which is assumed to be independently and normally distributed with a zero mean and constant variance.  $C$  is a constant which determines the “level” of the process,  $s$  denotes the number of seasons, e.g.,  $s = 12$  for monthly data.  $\varphi_p(B) = 1 - \varphi_1 B - \dots - \varphi_p B^p$  is the nonseasonal autoregressive (AR) polynomial, where  $p$  is the order of nonseasonal AR which represents the number of immediately preceding  $y$  values  $y_{t-1}, y_{t-2}, \dots, y_{t-p}$  that generate the current value of  $y_t$  in the model.  $\Phi_P(B^s) = 1 - \Phi_1 B^s - \Phi_2 B^{2s} \dots - \Phi_P B^{Ps}$  denotes the seasonal AR operator.  $\theta_q(B) = 1 - \theta_1 B - \dots - \theta_q B^q$  is the nonseasonal moving average (MA) polynomial, where  $q$  is the order of nonseasonal MA which refers to the number of lagged values for the error term.  $\theta_Q(B^s) = 1 - \theta_1 B^s - \dots - \theta_Q B^{Qs}$  is the seasonal MA polynomial.

$(1-B)^d(1-B^s)^D$  indicates nonseasonal differencing (subtracting the previous value from the current value) of order  $d$  and seasonal differencing of order  $D$  to make the time series stationary. When seasonality is not presented, the multiplicative ARIMA  $(p,d,q)$  model becomes  $\varphi_p(B)(1-B)^d y_t = C + \theta_q(B)\varepsilon_t$ .

The ARIMA modeling involves five iterative steps: 1) Identify trends, stationarity and seasonality through visual examination of the plots of time series, autocorrelation function (ACF) and partial autocorrelation function (PACF) and using the augmented Dickey Fuller stationary test, and then if needed, make series stationary by data transformation such as differencing of the time series; 2) find out tentative combinations of  $p$ ,  $d$  and  $q$  by visual inspection of the ACF and PACF plots and further filtration by combining the results of diagnostic statistics including the smallest canonical correlation, minimum information criterion

and extended sample autocorrelation function; 3) Estimate the coefficients of the selected models using exact maximum likelihood algorithm; 4) Perform diagnostic checking to choose the best model which should have the minimum Akaike's information criterion or Schwarz-Bayesian information criteria and normally distributed residuals with a zero mean and constant variance; 5) Forecast using the fitted model.

To examine changes in the monthly observed ASIRs in the pandemic period compared with the projected in the hypothetical continuation of the trends in pre-pandemic period of March 2016 to February 2020, we performed interrupted time series analysis with the ARIMA model.<sup>3</sup> The COVID-19 impact was evaluated by the changes in the level (a step change) and trend (slope) of the ASIRs.<sup>4-6</sup> The step change indicator variable,  $x_{1t}$ , takes a value of 1 for every month during the pandemic period and 0 prior to the start of the pandemic period, i.e., March 2020. The intervention variable, representing a gradual change in slope of the ASIRs,  $x_{2t}$ , takes 0 for every month prior to March 2020 and increases by 1 after March 2020. The intervention ARIMA model has the form

$$ASIR_t = \omega_1 x_{1t} + \omega_2 x_{2t} + n_t,$$

where  $ASIR_t$  represents the effects of the intervention in terms of the deterministic input series  $x_{1t}$  and  $x_{2t}$ , and  $n_t$ , an error or noise part, represents the ARIMA  $(p, d, q)(P, D, Q)_s$  process as described above. The interventional ARIMA  $(p, d, q)(P, D, Q)_s$  model selection for each study cohort (by cancer type or geographic area) was done for including the step change variable  $x_{1t}$  only and for including both the level shift  $x_{1t}$  and slope change  $x_{2t}$  variables in the models. The most appropriate impact indicator variables were selected by using the Akaike's information criterion and the Schwarz-Bayesian information criteria. The selected ARIMA  $(p, d, q)(P, D, Q)_s$  model was applied to the pre-pandemic period of March 2016 to February 2020 only to project the ASIRs in the absence of a pandemic.

**Supplementary Table S1. Quarterly age-standardized incidence rates per million among children <15 years of age between December 2017 and August 2020**

|                            | BASELINE<br>MEDIAN | COVID-19 PANDEMIC |           |           | INCIDENCE RATE RATIO OF ASIRS<br>(PANDEMIC/BASELINE MEDIAN) |                   |                   |
|----------------------------|--------------------|-------------------|-----------|-----------|-------------------------------------------------------------|-------------------|-------------------|
|                            | DEC17-FEB20        | MAR-MAY20         | JUN-AUG20 | SEP-NOV20 | MAR-MAY20                                                   | JUN-AUG20         | SEP-NOV20         |
| All cancers combined       | 158,4              | 157,7             | 164,6     | 148,0     | 1.00 (0.83– 1.19)                                           | 1.04 (0.87– 1.24) | 0.93 (0.78– 1.12) |
| Sex                        |                    |                   |           |           |                                                             |                   |                   |
| Males                      | 173,7              | 167,7             | 194,1     | 151,6     | 0.97 (0.76– 1.23)                                           | 1.12 (0.88– 1.41) | 0.87 (0.68– 1.12) |
| Females                    | 149,5              | 147,2             | 133,5     | 144,1     | 0.98 (0.75– 1.29)                                           | 0.89 (0.68– 1.17) | 0.96 (0.74– 1.26) |
| Age (in years)             |                    |                   |           |           |                                                             |                   |                   |
| <1                         | 265,0              | 312,9             | 309,0     | 253,9     | 1.18 (0.69– 2.01)                                           | 1.17 (0.68– 1.99) | 0.96 (0.55– 1.68) |
| 1 to 4                     | 220,1              | 228,1             | 242,7     | 217,6     | 1.04 (0.77– 1.39)                                           | 1.10 (0.82– 1.48) | 0.99 (0.73– 1.34) |
| 5 to 9                     | 121,3              | 97,8              | 95,9      | 109,7     | 0.81 (0.56– 1.17)                                           | 0.79 (0.54– 1.15) | 0.90 (0.63– 1.30) |
| 10 to 14                   | 131,1              | 127,9             | 139,0     | 108,0     | 0.98 (0.69– 1.37)                                           | 1.06 (0.76– 1.48) | 0.82 (0.58– 1.18) |
| Region                     |                    |                   |           |           |                                                             |                   |                   |
| Atlantic                   | 152,1              | 177,6             | 123,1     | 201,4     | 1.17 (0.55– 2.46)                                           | 0.81 (0.35– 1.85) | 1.32 (0.64– 2.73) |
| Quebec                     | 166,4              | 151,0             | 167,8     | 131,0     | 0.91 (0.62– 1.33)                                           | 1.01 (0.69– 1.46) | 0.79 (0.53– 1.17) |
| Ontario                    | 168,5              | 162,7             | 169,8     | 153,1     | 0.97 (0.72– 1.29)                                           | 1.01 (0.76– 1.34) | 0.91 (0.68– 1.22) |
| Prairies                   | 144,6              | 173,6             | 184,1     | 163,5     | 1.20 (0.82– 1.77)                                           | 1.27 (0.87– 1.87) | 1.13 (0.76– 1.67) |
| British Columbia           | 142,9              | 108,4             | 133,2     | 113,6     | 0.76 (0.42– 1.38)                                           | 0.93 (0.53– 1.64) | 0.79 (0.44– 1.43) |
| Cancer type                |                    |                   |           |           |                                                             |                   |                   |
| I Leukemias                | 50,1               | 49,0              | 59,5      | 49,1      | 0.98 (0.71– 1.35)                                           | 1.19 (0.87– 1.62) | 0.98 (0.71– 1.36) |
| II Lymphomas               | 18,8               | 22,0              | 28,9      | 17,9      | 1.17 (0.71– 1.93)                                           | 1.54 (0.96– 2.47) | 0.95 (0.56– 1.62) |
| III CNS                    | 39,5               | 35,4              | 30,2      | 35,3      | 0.89 (0.62– 1.30)                                           | 0.76 (0.52– 1.13) | 0.89 (0.62– 1.29) |
| IV Neuroblastoma           | 12,5               | 13,8              | 11,3      | 11,0      | 1.10 (0.58– 2.08)                                           | 0.90 (0.46– 1.76) | 0.87 (0.45– 1.72) |
| V Retinoblastoma           | 2,1                | 2,7               | 4,9       | 3,5       | 1.29 (0.29– 5.75)                                           | 2.30 (0.59– 8.90) | 1.66 (0.40– 6.96) |
| VI Renal tumors            | 7,3                | 9,5               | 7,5       | 8,3       | 1.30 (0.59– 2.86)                                           | 1.03 (0.45– 2.38) | 1.14 (0.50– 2.58) |
| VII Hepatic tumors         | 4,2                | 2,8               | 4,8       | 3,5       | 0.67 (0.19– 2.38)                                           | 1.15 (0.39– 3.42) | 0.83 (0.25– 2.74) |
| VIII Bone tumors           | 6,1                | 4,7               | 3,3       | 4,5       | 0.77 (0.29– 2.07)                                           | 0.54 (0.18– 1.61) | 0.74 (0.28– 1.99) |
| IX Soft tissue sarcomas    | 9,3                | 5,9               | 11,0      | 8,8       | 0.63 (0.27– 1.46)                                           | 1.18 (0.57– 2.41) | 0.95 (0.44– 2.01) |
| X Germ cell tumors         | 6,1                | 7,4               | 2,6       | 2,7       | 1.21 (0.50– 2.92)                                           | 0.43 (0.13– 1.38) | 0.44 (0.13– 1.42) |
| XI Carcinomas <sup>a</sup> | 5,5                | 4,0               | 0,7       | 2,7       | 0.73 (0.25– 2.10)                                           | 0.12 (0.02– 0.96) | 0.49 (0.15– 1.63) |
| XII Others                 | 0,7                | 0,7               | 0,0       | 0,7       | 0.95 (0.06–15.25)                                           | 0.00 (–)          | 1.02 (0.06–16.34) |

<sup>a</sup> Include the following diagnoses: adrenocortical carcinomas, thyroid carcinomas, nasopharyngeal carcinomas, malignant melanomas, skin carcinomas and other and unspecified carcinomas.

Abbreviations: ASIR: age-standardized incidence rates; CNS: central nervous system

## REFERENCES

1. Gomez V, Maravall A: Automatic modeling methods for univariate series, Wiley Online Library, 2001, pp 171-201
2. US Bureau of the Census: X-13ARIMA-SEATS Reference Manual, version 1.1. Washington, DC., 2013
3. Box GE, Jenkins GM: Time series analysis: Forecasting and control San Francisco. Calif: Holden-Day, 1976
4. Schaffer AL, Dobbins TA, Pearson S-A: Interrupted time series analysis using autoregressive integrated moving average (ARIMA) models: a guide for evaluating large-scale health interventions. *BMC Med Res Methodol* 21:1-12, 2021
5. Campitelli MA, Bronskill SE, Maclagan LC, et al: Comparison of Medication Prescribing Before and After the COVID-19 Pandemic Among Nursing Home Residents in Ontario, Canada. *JAMA Netw Open* 4:e2118441-e2118441, 2021
6. Box GE, Tiao GC: Intervention analysis with applications to economic and environmental problems. *J Am Stat Assoc* 70:70-79, 1975
7. Kim HJ, Fay MP, Yu B, et al: Comparability of segmented line regression models. *Biometrics* 60:1005-1014, 2004
8. Institute NC: Joinpoint Regression Program, Version 4.7. 0.0-February 2019, Statistical Methodology and Applications Branch, Surveillance Research Program, 2019
